# Supplementary material
Source: HighWire-hosted journal article supplement (https://bmjopen.bmj.com/content/12/1/e055827)
Supplement: inline-supplementary-material-2 [file inline-supplementary-material-2.pdf]

## Supplementary File 2 – Description of sample for veterinarians with serious suicidal thoughts

| Variable                             | Range of values | Frequency (%) | Mean (SD)   |
|--------------------------------------|-----------------|---------------|-------------|
| <b>Gender</b>                        |                 |               |             |
| Female                               |                 | 108 (79.4%)   |             |
| Male                                 |                 | 28 (20.6 %)   |             |
| <b>Age</b>                           |                 |               |             |
| 20-30                                |                 | 16 (11.7 %)   |             |
| 31-40                                |                 | 47 (34.3 %)   |             |
| 41-50                                |                 | 41 (29.9 %)   |             |
| 51-60                                |                 | 21 (15.3 %)   |             |
| 61-70                                |                 | 10 (7.3 %)    |             |
| >70                                  |                 | 2 (1.5 %)     |             |
| <b>Marital status</b>                |                 |               |             |
| Married/cohabiting                   |                 | 82 (61.2 %)   |             |
| Single/divorced/widow(er)            |                 | 52 (38.8 %)   |             |
| <b>Life events</b>                   | 0-9             |               | 1.3 (1.4)   |
| <b>SCL-5</b>                         | 1-5             |               | 3.3 (1.0)   |
| <b>Reality weakness</b>              | 0-8             |               | 3.2 (2.1)   |
| <b>Alcohol to cope</b>               |                 |               |             |
| Never                                |                 | 73 (53.3 %)   |             |
| Any frequency                        |                 | 64 (46.7 %)   |             |
| <b>Main field of work</b>            |                 |               |             |
| Companion animal practice            |                 | 53 (39.6 %)   |             |
| Public administration                |                 | 21 (15.7 %)   |             |
| Mixed clinical practice              |                 | 13 (9.7 %)    |             |
| Academia/research                    |                 | 11 (8.2 %)    |             |
| Production animal practice           |                 | 11 (8.2 %)    |             |
| Aquaculture                          |                 | 6 (4.5 %)     |             |
| Equine practice                      |                 | 6 (4.5 %)     |             |
| Other                                |                 | 10 (7.5 %)    |             |
| Pensioner                            |                 | 3 (2.2 %)     |             |
| <b>Job stress</b>                    |                 |               |             |
| Emotional demands                    | 1 - 5           |               | 2.44 (0.84) |
| Work/life-balance                    | 1 - 5           |               | 3.22 (0.98) |
| Fear of complaints                   | 1 - 5           |               | 3.63 (1.11) |
| <b>Connection to work-life</b>       |                 |               |             |
| Employed                             |                 | 80 (58.4 %)   |             |
| Self-employed                        |                 | 37 (27.0 %)   |             |
| Other                                |                 | 11 (8.0 %)    |             |
| Two or more connections to work life |                 | 9 (6.6 %)     |             |
| <b>Position type</b>                 |                 |               |             |
| Permanent position                   |                 | 115 (87.8 %)  |             |
| Temporary position                   |                 | 6 (4.6 %)     |             |
| Temporary educational position       |                 | 2 (1.5 %)     |             |
| Other                                |                 | 8 (6.1 %)     |             |
| <b>Working full-time</b>             |                 | 101 (75.4 %)  |             |

|                                                            |  |             |  |
|------------------------------------------------------------|--|-------------|--|
| <b>Frequency of working overtime (weekly or bi-weekly)</b> |  | 92 (71.9 %) |  |
|------------------------------------------------------------|--|-------------|--|
